# Supplementary material for: Drug discovery-based approach identifies improved nitrification inhibitors
Source: Research Square preprint supplement (doi:10.21203/rs.3.rs-2297595/v1), 2022-12-29
Supplement: Supplementary file 1 [file 05e787bf68be086042a33e1e.xlsx]

## Sheet: __JChemStructureSheet
Hash	StructureStringLength	StructureStringFormat	StructureString
AA7C43947CC162CA7C1BD05DC3159902	1	cxsmiles	JChemExcelKgAAAB+LCAAAAAAABABzdtZw1vQz9LN1djaydQbRGs62zkbOGrb+QGFn52BnZ0NNkBpnAF+msRwqAAAA
7851736ECADD252CE74365A964ADEE66	1	cxsmiles	JChemExcelOgAAAB+LCAAAAAAABABzdtZw1nQ2tPVzNrIFMoEcWz8/I6CQhq2zIYj01/RDVhEMFLR1BiIjAOKMTiM6AAAA
228659658E29260FB8E6188A9D6A5D21	1	cxsmiles	JChemExcelNwAAAB+LCAAAAAAABACL9oj103B29nfWdNaw9dd0NrR1NnK29QOKaQCFNJ2NbP2AEs6GYBlnW7AokAsA+EaHxDcAAAA=
DB1A5E8BBFEB41D502489F6725C2F298	1	cxsmiles	JChemExcelOAAAAB+LCAAAAAAABAAdyaENACAMBdF1Wvnrq86gikAS9l+DQs5c8vY4ZVhOR0lPEYnIqsDwTqCnXwwIX7r05BrVOAAAAA==
EEA89AD2B19BE7303EECA89465E0807E	1	cxsmiles	JChemExcelPQAAAB+LCAAAAAAABAAdyiESADAIA8HvEAk+6jx8pP/XpVWZ2RwdMKQhONoxKcKjh7Uq90ai3OvvzZ9NXrOib5c9AAAA
234E6CF2443330F69D0255064EEB6661	1	cxsmiles	JChemExcelMwAAAB+LCAAAAAAABACL9oj103B2NnR2dvY31HTWsPXXdDa0dQYy/JyNbIHitn5+Rs7OEEEwMgQAsQMf3jMAAAA=

## Sheet: Table S4
Supplementary Table S4: Molecules present in the screened collection with a SIAS-like scaffold that effectively inhibit nitrification of Nitrososphaera viennensis in a dose-response experiment. Besides SIAS, none of these molecules showed a synergistic effect with DMP in the soil assay.
					Relative nitrification % of Nitrososphaera viennensis upon treatment with SIAS-like structures at indicated concentrations (µM).
SMILES	IUPAC-name	Structure	Name	Synergistic effect upon co-application with DMP	0.497363	0.870386	1.52317	2.66556	4.66472	8.16327	14.2857	25
CC(C)N1N=CC2=C1N=C(C=C2C(=O)N1CCSCC1)C(C)C	4-[1,6-bis(propan-2-yl)-1H-pyrazolo[3,4-b]pyridine-4-carbonyl]thiomorpholine		SIAS	Yes	104.205	103.203	96.8662	91.3839	75.4764	36.1954	1.18959	-0.279626
CC(C)C1=NC2=C(C(C)=NN2C)C(=C1)C(=O)N(C)C1=NC2=C(S1)C=CC=C2	N-(1,3-benzothiazol-2-yl)-N,1,3-trimethyl-6-(propan-2-yl)-1H-pyrazolo[3,4-b]pyridine-4-carboxamide		SIAS-like1	No	49.0378	1.11747	-2.07975	-2.29197	-2.36768	-2.49642	-2.85244	-2.99642
[H]N(CCOC)C(=O)C1=C2C=NN(C(C)C)C2=NC(=C1)C1=CC=C(C)C=C1	N-(2-methoxyethyl)-6-(4-methylphenyl)-1-(propan-2-yl)-1H-pyrazolo[3,4-b]pyridine-4-carboxamide		SIAS-like2	No	51.705	21.4488	0.901082	-0.344247	-0.947381	-1.07838	-1.49193	-1.13696
[H]N(C(=O)C1=CC(=NC2=C1C=NN2C(C)C)C1CC1)C1=NC2=C(CCC2)S1	N-{4H,5H,6H-cyclopenta[d][1,3]thiazol-2-yl}-6-cyclopropyl-1-(propan-2-yl)-1H-pyrazolo[3,4-b]pyridine-4-carboxamide		SIAS-like3	No	84.6888	65.1127	27.1796	12.4963	7.37712	4.83936	3.53767	1.50999
CN(CCOC1=CC(Cl)=CC=C1)C(=O)C1=C2C(C)=NN(C)C2=NC(=C1)C1=CC=CO1	N-[2-(3-chlorophenoxy)ethyl]-6-(furan-2-yl)-N,1,3-trimethyl-1H-pyrazolo[3,4-b]pyridine-4-carboxamide		SIAS-like4	No	109.719	110.685	108.12	106.896	97.8519	92.574	67.6285	5.16817
[H]N(CC1CCCO1)C(=O)C1=CC(=NC2=C1C=NN2CC)C1=CC=CC=C1	1-ethyl-N-[(oxolan-2-yl)methyl]-6-phenyl-1H-pyrazolo[3,4-b]pyridine-4-carboxamide		SIAS-like5	No	107.775	108.191	109.082	107.918	107.107	102.924	96.3016	53.9598
