# Supplementary material for: Drug discovery-based approach identifies improved nitrification inhibitors
Source: Research Square preprint supplement (doi:10.21203/rs.3.rs-2297595/v1), 2022-12-29
Supplement: Supplementary file 2 [file 312d94c9597cdfdb4456b9bd.xlsx]

## Sheet: __JChemStructureSheet
Hash	StructureStringLength	StructureStringFormat	StructureString
56F8D817AA87CD147EFD38A603E5DAB1	1	cxsmiles	JChemExcelIwAAAB+LCAAAAAAABABzdvbTcPYz9LN11gh21gx2NrQN1nQ2dHYO1rD11wRhZ0MANPDSPCMAAAA=
655535EDF297C1539FA4A1A73057484E	1	cxsmiles	JChemExcelJQAAAB+LCAAAAAAABABzDnY2tPXz03D2M3J2BlLORprBGs6aGrb+mkDkrGEbrBlsCADVUq7IJQAAAA==
C773A289636CED55AE80403869D32E0E	1	cxsmiles	JChemExcelJgAAAB+LCAAAAAAABAANxaEBADAIA8F1iAR01PsY9t+lPXOQxkmRgR9rjkLOCka07wEyAZz9JgAAAA==
5B4D647F23BB863B0DE492A3A710A50C	1	cxsmiles	JChemExcelJAAAAB+LCAAAAAAABABzdvbTcDZ0BpF+Rn62zsHORrbBms7OhprBGs6aGrb+mrb+AHmursgkAAAA
E90D6CA14C7581AC7BDE871A1D7D8B36	1	cxsmiles	JChemExcelHgAAAB+LCAAAAAAABAALtnU2DHa29fMzdAYiZ2cjW2cNZ0NNZ1tnIDICADVLkbQeAAAA
63563D78014E7A4E5EFCCB7DCAD5563D	1	cxsmiles	JChemExcelGAAAAB+LCAAAAAAABABz9nd2NnR29tNw9jPys3UOdjayDdYECgEAEzPswxgAAAA=
50F53F6312F4B0D93E806A83648CD6B4	1	cxsmiles	JChemExcelIAAAAB+LCAAAAAAABAALtnU2DHa29fMzdAYiZz8NZ2dDTWdDW2dnMDIEAPfphP0gAAAA
7B88374D9FBAA9A3426DD3A0D7033509	1	cxsmiles	JChemExcelKAAAAB+LCAAAAAAABAANw6ERAEAIA8F2QAYfdT4I+u/lf2cWytvIYOpXR5AiE3OMr0EPjlcyVCgAAAA=
B39197584A9188B827EFC9A8A2B5B8C7	1	cxsmiles	JChemExcelHAAAAB+LCAAAAAAABAALtnU2DHa29fMzdAYiZ2cjW2cNZ0NNZ1vnYCMAbRUv9RwAAAA=
EAF54D469934049132B540EBB374F183	1	cxsmiles	JChemExcelIQAAAB+LCAAAAAAABABz9nc2tHV2tnXWAGJDTWdDZ2dnP0Mg8rN1DgZKBQMA4pFniiEAAAA=
8722D3D6970CC91CBF6CF13CE2526403	1	cxsmiles	JChemExcelJAAAAB+LCAAAAAAABAAFwaEBAAAIw7B3QAJ6qn4I/v+FhKVELIloHHgsjtEl0KIeWicOniQAAAA=
C13C35D513F1B93CE5B1820764904495	1	cxsmiles	JChemExcelIAAAAB+LCAAAAAAABAALtnU2DHa29fMzdAYiZz8NZ2dDTWdDWz9nW2egsCEAa4Iv0yAAAAA=
4B04F1D3EB59C430EF9A5C5D7A6F0C7C	1	cxsmiles	JChemExcelKwAAAB+LCAAAAAAABACL9oj103DWsPXXdDZ0dnYGsv2M/Gydg52NbIOBQkBk6+wMRoYAN60ePisAAAA=
3E22B58089CCF5465C035960A0C0CAC9	1	cxsmiles	JChemExcelLQAAAB+LCAAAAAAABAANyaERACAMBMF2Esn7V2dQQUQy9N8Gsbt3vwqS8EmWwQQjpTKN3IlAObE+K92NQS0AAAA=
6C85E52C0A5849DC50E74589A15518B7	1	cxsmiles	JChemExcelHwAAAB+LCAAAAAAABABz9tNw9jN0dvZ3NrQN1nQGks4azjmazrbOQGToBgCWF4z3HwAAAA==
7CBABCE9308C491B1424431D11E9E7AF	1	cxsmiles	JChemExcelIwAAAB+LCAAAAAAABABzcza0ddZwtnUGIkNNP0NnZz8NZz8jP1vnYGcj22BNZ2dDACujPGMjAAAA
8D8E6027A6105868FE98B40FB73F8B40	1	cxsmiles	JChemExcelJQAAAB+LCAAAAAAABADzt3XWcDZ0dvbTcPYz8rN1DnY2sg3WdHY21HQ2tHV2BiNDAAKSJF8lAAAA
C1FB8303C2984BCC582FDE35478C5459	1	cxsmiles	JChemExcelIAAAAB+LCAAAAAAABAALtnU2DHa29fMzdAYiZz8NZ2dDTWdDWz9nW2c/oBwA+yTrlCAAAAA=
1F7E2BB3292D24E4296EF31154DCD9F6	1	cxsmiles	JChemExcelJwAAAB+LCAAAAAAABAANwqERAAAIA7F1QAK66n0N++8CuYAL2cFPaJkRsZ2IP0lpD2zCPxknAAAA
81BEB3B4D91BCCF30CC9BFFEB548C544	1	cxsmiles	JChemExcelHAAAAB+LCAAAAAAABABzdjZ09tNw9jPys3XWcNYMdjayDdZ0BjH9DQEFvlO9HAAAAA==
743416D0E8CC49EBD954CEB6B1D077D9	1	cxsmiles	JChemExcelKAAAAB+LCAAAAAAABABz9nc2tHXWcPYzcnb2A1LGfrbOwc7GtsGazs5Gms4gKRBpCADNdwplKAAAAA==
24FFEDF377D633BF55D584AB9A1C01C4	1	cxsmiles	JChemExcelKwAAAB+LCAAAAAAABAAVyKEBADAIA8F1iAw+6j0V7L9LW3HmoHKEA6EeawxTTM8fLZ0V+AI1IqESKwAAAA==
9353393465E877F2E7A7F597ABBDFA61	1	cxsmiles	JChemExcelIwAAAB+LCAAAAAAABABzcza0dXa2ddYAYkNNZ0NnPw1nPyM/W+dgZyPbYE1nZ39DAIItA7MjAAAA
25FD10E36924756E617B88AC42562871	1	cxsmiles	JChemExcelJwAAAB+LCAAAAAAABABz9nc2tHXWcLZ1BiJDTT9DZ2c/DWc/Iz+QoGaws5FtsKazsyEAc3zZZScAAAA=
03FDAF2623FC067ED68FCCBEF7448C17	1	cxsmiles	JChemExcelIgAAAB+LCAAAAAAABABz9tNw9jN0dvZ3NrQN1nQGkn7ORrbOGsGGms62zkBkBACQAu02IgAAAA==
6B9484A90FF262F62D36FFB1ECDABEB4	1	cxsmiles	JChemExcelIgAAAB+LCAAAAAAABABz9tNw9jN0dg52NrQN1nQGks4azjmafrbORsHOtkApIwBatvrEIgAAAA==
7C1AE023DAF68FA5FE29DD5069B3F740	1	cxsmiles	JChemExcelJQAAAB+LCAAAAAAABABzdja09fPTcPYzcnYGUs5Gms5Gts7OYARka9gGawYbAgCJAx/dJQAAAA==
D2828FF19CAFC934C96E19539E0B269F	1	cxsmiles	JChemExcelKAAAAB+LCAAAAAAABABzdja09fPTcPYzcnYGUs5Gms5Gts4abprOts5ABORq2AZrBhsCAOu29D0oAAAA
95BEBE6AD80154866A8F66F1C4C8B9B8	1	cxsmiles	JChemExcelKAAAAB+LCAAAAAAABABzdja09fPTcPYzcnYGUs5Gms5Gts7Ots4abppAEsjVsA3WDDYEANo3FTYoAAAA
1996E88C8D2388E7B3EC7CD63A73113A	1	cxsmiles	JChemExcelGQAAAB+LCAAAAAAABABzdjZ0dvbTcPYz8rN11nDWDHY2sg3WdHY2BAAisyIsGQAAAA==
ABF179FC8CECC3E3ADC3FFCCD214BCC2	1	cxsmiles	JChemExcelIQAAAB+LCAAAAAAABAAFwaEBAAAIw7B3mAT0VP0M//9CAu2kyABrihHmVpRP1w+6mh9AIQAAAA==
9FB5D382C5041A975FCE51AD2EFD090C	1	cxsmiles	JChemExcelIwAAAB+LCAAAAAAABABzdja09fPTcPYzcnZ2NrZ11nA20nS2dQYiY01nDdtgzWBDANNkJHEjAAAA
D7BA498045559591145BAED5DDDC22B7	1	cxsmiles	JChemExcelLgAAAB+LCAAAAAAABACL9oj103A2dHYGkn5GfrbOGs6awc5GtsGazs6Gms4atv6azoa2zs5gZAgAmqxkky4AAAA=
2F553CFB1E67584674E43EFFA88AAC9F	1	cxsmiles	JChemExcelJQAAAB+LCAAAAAAABAANxqEBAAAIw7B3QDI/VT/D/7+ASmCcFBE8qJGDwfmXt3cOYMqrISUAAAA=
A910B3B5BCDCEFAC636C3E408AC07161	1	cxsmiles	JChemExcelLQAAAB+LCAAAAAAABAAVyaEBADAMw7B3GtjxIPMO9P9flkFbTCHKV7ThmMK0sqfnlzayIvgA0ctxXS0AAAA=
428942452A823586277C2DD27AC993DE	1	cxsmiles	JChemExcelJAAAAB+LCAAAAAAABABzc9Zw0wQiZz9DZ2dnDWdDW39NPw1nTec8jWQjzbzkZCPnHAC/HGzwJAAAAA==
3CD2A366ACB027DAB932921252BFEE66	1	cxsmiles	JChemExcelKAAAAB+LCAAAAAAABABzc9Zw0wSiZMPk5LxkjTxDTT8NZ2cjTWdnPyPnPI1kY8285GRj5xwAjhuHRCgAAAA=
7E581980F4225A14DB12131570248459	1	cxsmiles	JChemExcelJgAAAB+LCAAAAAAABAArNkwGAkNnPw1nDWdnI03nYCMNW39NIHLO00g21sxLTjZ2zgEAlUR5aSYAAAA=

## Sheet: Table S2
Supplementary Table S2: Relative nitrification % in the primary screen, confirmation screen and dose-response assays of N. europaea and N. multiformis treated with chloro-pyrazole-, oxazolidine-, thiadiazole-, thiazolodine- or triazole-containing molecules. Primary and confirmation screen data has one repeat. Dose-response data show the average of 4 repeats per dose.
					Primary screen		Confirmation screen		Dose-response in N. europaea at indicated concentrations (µM)								Dose-response in N. multiformis at indicated concentrations (µM)
STRUCTURE	SMILES	IUPAC name	Compound number	Group	N. europaea	N. multiformis	N. europaea	N. multiformis	1.98945	3.48154	6.0927	10.6622	18.6589	32.6531	57.1429	100	1.98945	3.48154	6.0927	10.6622	18.6589	32.6531	57.1429	100
	FC(F)(F)c1ccnc(n1)N1CCN(Cn2cc(Cl)cn2)CC1	2-{4-[(4-chloro-1H-pyrazol-1-yl)methyl]piperazin-1-yl}-4-(trifluoromethyl)pyrimidine	1	Chloro-pyrazole	5.12164	17.4737	-113.204	5.11788	93.901	84.5552	69.7221	45.8558	22.5825	1.65112	-10.9081	-16.4295	78.5523	82.16	82.4512	62.4003	36.8631	12.64	2.89445	-2.35416
	CN(Cn1cc(Cl)cn1)C1CCN(CC(F)(F)F)C1=O	3-{[(4-chloro-1H-pyrazol-1-yl)methyl](methyl)amino}-1-(2,2,2-trifluoroethyl)pyrrolidin-2-one	2	Chloro-pyrazole	-5.46985	23.5495	-91.6737	6.95802	86.3954	76.4791	65.5532	41.947	15.5916	-2.77934	-11.038	-17.5296	87.7454	82.078	72.4662	51.7199	27.6339	10.4601	3.11341	-2.69076
	Clc1cnn(CN(Cc2cccs2)C2CCS(=O)(=O)C2)c1	3-{[(4-chloro-1H-pyrazol-1-yl)methyl][(thiophen-2-yl)methyl]amino}-1λ⁶-thiolane-1,1-dione	3	Chloro-pyrazole	6.95321	30.3266	-72.8343	12.4784	85.2407	74.186	59.9516	36.0153	18.1468	-1.35224	-10.9964	-16.1376	71.0616	75.3395	68.2834	53.5827	27.0392	11.2737	2.87478	-1.12542
	FC1=CC=C(C=C1)C1CN(CN2N=CSC2=S)CCO1	3-{[2-(4-fluorophenyl)morpholin-4-yl]methyl}-2,3-dihydro-1,3,4-thiadiazole-2-thione	4	Thiadiazole	-5.31837	9.25684	-91.6737	6.95802	90.0804	88.2667	85.5254	65.5087	29.321	4.1646	-5.03536	-13.2283	67.8884	55.2366	48.4811	31.9971	19.3591	9.65275	2.9761	-0.827965
	S=C1SC=NN1CN1CCC2=C(C1)C=CC=C2	3-[(1,2,3,4-tetrahydroisoquinolin-2-yl)methyl]-2,3-dihydro-1,3,4-thiadiazole-2-thione	5	Thiadiazole	20.9281	14.4349	-21.6989	17.9988	92.6981	85.1005	82.2643	62.5671	31.459	6.7228	-5.48355	-13.251	58.6616	48.8799	36.0788	28.0949	18.8852	8.90107	2.87794	-1.24305
	[H]N(C)C(=O)C1=CC=C(CN(CN2N=CSC2=S)C2CC2)C=C1	4-({cyclopropyl[(2-sulfanylidene-2,3-dihydro-1,3,4-thiadiazol-3-yl)methyl]amino}methyl)-N-methylbenzamide	6	Thiadiazole	3.59955	57.2347	2.52313	14.3186	93.575	90.1777	87.1136	66.8658	45.3689	8.97124	-2.77002	-8.92445	63.1949	50.6775	43.0889	30.4119	20.1305	10.4241	3.80944	1.37142
	COCC1CCN(CN2N=CSC2=S)CC1	3-{[4-(methoxymethyl)piperidin-1-yl]methyl}-2,3-dihydro-1,3,4-thiadiazole-2-thione	7	Thiadiazole	18.8527	34.927	-19.0076	16.1587	99.242	86.5067	86.5888	69.585	37.5701	9.38804	-1.94236	-9.77085	58.1879	52.5602	40.3961	26.2321	20.0911	10.7019	6.22462	0.757046
	COC1=C(OC)C=C2CN(CN3N=CSC3=S)CCC2=C1	3-[(6,7-dimethoxy-1,2,3,4-tetrahydroisoquinolin-2-yl)methyl]-2,3-dihydro-1,3,4-thiadiazole-2-thione	8	Thiadiazole	5.31136	51.9054	-29.7729	8.79816	91.1128	85.5205	83.7248	70.0587	42.9157	9.69906	-1.76081	-9.88978	59.5903	49.9849	37.9778	30.4316	20.1698	11.7707	5.53176	3.39119
	O=C(C1CCN(CN2N=CSC2=S)CC1)C1=CC=CC=C1	3-[(4-benzoylpiperidin-1-yl)methyl]-2,3-dihydro-1,3,4-thiadiazole-2-thione	9	Thiadiazole	-1.25e-14	52.09	-5.55088	10.6383	92.6897	88.9793	85.2145	73.385	38.118	13.5101	-0.0804116	-8.96803	62.7437	57.6518	46.2392	35.3633	18.6661	13.336	6.5024	1.66866
	COC1=C(CN2CCN(CN3N=CSC3=S)CC2)C=C(C)C=C1	3-({4-[(2-methoxy-5-methylphenyl)methyl]piperazin-1-yl}methyl)-2,3-dihydro-1,3,4-thiadiazole-2-thione	10	Thiadiazole	-4.17484	44.4444	-37.8469	8.79816	88.8261	85.3288	83.6766	67.0232	43.7502	9.56239	-1.12495	-8.82921	62.7045	53.0929	44.4915	33.9776	23.4607	11.8913	5.829	1.29293
	COC1=CC=C(C=C1)C1CCCN1CN1N=CSC1=S	3-{[2-(4-methoxyphenyl)pyrrolidin-1-yl]methyl}-2,3-dihydro-1,3,4-thiadiazole-2-thione	11	Thiadiazole	11.1722	72.9304	-37.8469	12.4784	91.0523	89.8598	86.111	62.6409	45.0072	8.16526	-1.99993	-8.97038	65.1559	58.9366	46.5565	29.876	23.5785	10.6234	4.22452	1.03482
	CCN(C1CCN(CN2N=CSC2=S)CC1)S(C)(=O)=O	N-ethyl-N-{1-[(2-sulfanylidene-2,3-dihydro-1,3,4-thiadiazol-3-yl)methyl]piperidin-4-yl}methanesulfonamide	12	Thiadiazole	24.1085	43.9024	-2.85955	6.95802	92.0823	86.9338	81.054	65.5626	37.0056	11.7742	-0.992422	-8.14729	56.3054	51.5699	37.7816	30.6311	14.7249	11.5549	7.2344	4.77691
	CN(CN1CCSC1=S)CC1=C(Cl)N=C2SC=CN12	3-{[({6-chloroimidazo[2,1-b][1,3]thiazol-5-yl}methyl)(methyl)amino]methyl}-1,3-thiazolidine-2-thione	13	Thiazolidine	-7.62555	4	-140.118	-4.08281	82.8933	69.3726	50.3063	14.3594	-20.4197	-23.047	-24.1267	-24.7827	1.84532	-2.17455	-3.46211	-4.29544	-3.56323	-6.03743	-5.68117	-6.31521
	CN(C)C(=O)C1=CC2=C(C=C1)N(CN1N=C(C)SC1=S)CCC2	N,N-dimethyl-1-[(5-methyl-2-sulfanylidene-2,3-dihydro-1,3,4-thiadiazol-3-yl)methyl]-1,2,3,4-tetrahydroquinoline-6-carboxamide	14	Thiadiazole	-35.995	-3.18755	-123.97	5.11788	93.8309	85.0485	72.2056	31.8647	2.03102	-16.1396	-20.5617	-22.9372	14.9014	9.0187	1.72769	-2.15487	-3.73989	-5.34457	-5.66149	-5.62235
	CC1=NN(CN2CCC3=C(C2)C=CS3)C(=S)S1	5-methyl-3-({4H,5H,6H,7H-thieno[3,2-c]pyridin-5-yl}methyl)-2,3-dihydro-1,3,4-thiadiazole-2-thione	15	Thiadiazole	-21.0623	22.4704	-123.97	5.11788	92.2615	87.9828	78.251	37.204	6.26809	-12.5821	-18.7472	-21.753	16.0683	8.52217	4.73777	-0.115429	-2.41298	-4.35426	-4.37393	-4.96863
	[H]N(C1CCN(CN2N=C(C)SC2=S)CC1)C(=O)C1=CC=CC=C1	N-{1-[(5-methyl-2-sulfanylidene-2,3-dihydro-1,3,4-thiadiazol-3-yl)methyl]piperidin-4-yl}benzamide	16	Thiadiazole	-29.6963	-14.791	-107.822	-2.24267	90.3826	81.7424	71.623	38.0839	7.1693	-13.4138	-18.7203	-22.1901	14.5844	8.14622	2.00546	0.538085	-2.76925	-3.75956	-4.03734	-3.99819
	CC1CCN(CN2N=C(C)SC2=S)CC1	5-methyl-3-[(4-methylpiperidin-1-yl)methyl]-2,3-dihydro-1,3,4-thiadiazole-2-thione	17	Thiadiazole	-14.4689	26.6754	-129.352	-2.24267	92.6984	85.032	78.8171	41.6056	12.5263	-3.89526	-16.6154	-19.5631	13.7316	7.94694	1.94665	-0.628678	-2.55028	-3.40329	-3.04702	-5.02745
	CC(=O)C1=CC=C(C=C1)N1CCN(CN2N=C(C)SC2=S)CC1	1-(4-{4-[(5-methyl-2-sulfanylidene-2,3-dihydro-1,3,4-thiadiazol-3-yl)methyl]piperazin-1-yl}phenyl)ethan-1-one	18	Thiadiazole	-4.48233	4.93066	-70.143	1.43761	96.3879	92.1712	87.2841	65.1447	23.6661	-8.44035	-17.1179	-20.6415	22.6305	11.9308	4.5023	1.07417	-2.80839	-4.05681	-6.69095	-6.35435
	CCN(CN1N=C(SC)SC1=S)C1CCS(=O)(=O)C1	3-[ethyl({[5-(methylsulfanyl)-2-sulfanylidene-2,3-dihydro-1,3,4-thiadiazol-3-yl]methyl})amino]-1λ⁶-thiolane-1,1-dione	19	Thiadiazole	49.1194	44.4138	21.3625	32.72	90.5276	94.2578	87.6608	73.5446	77.9618	67.6096	52.739	33.3313	81.6908	77.6637	70.3842	57.7757	57.4975	47.4527	37.4802	26.7829
	CC1=NN(CN2CCN(CC2)C2=NC=CC=N2)C(=S)S1	5-methyl-3-{[4-(pyrimidin-2-yl)piperazin-1-yl]methyl}-2,3-dihydro-1,3,4-thiadiazole-2-thione	20	Thiadiazole	-31.5403	2.29148	-110.513	1.43761	87.9299	90.7342	88.9871	76.8315	42.0609	8.00194	-11.9613	-17.6612	23.7353	15.5942	8.424	2.95643	-0.847639	-2.78892	-3.40329	-4.35426
	CSC1=NN(CN2CCN(CC2)S(C)(=O)=O)C(=S)S1	3-[(4-methanesulfonylpiperazin-1-yl)methyl]-5-(methylsulfanyl)-2,3-dihydro-1,3,4-thiadiazole-2-thione	21	Thiadiazole	47.0696	81.3403	34.8192	17.9988
	S=C1SC=NN1CN1CCN(CC1)C1=CC=CC=C1	3-[(4-phenylpiperazin-1-yl)methyl]-2,3-dihydro-1,3,4-thiadiazole-2-thione	22	Thiadiazole	16.4733	23.5518	-43.2296	8.79816
	CC(=O)C1=CC=C(C=C1)N1CCN(CN2N=CSC2=S)CC1	1-(4-{4-[(2-sulfanylidene-2,3-dihydro-1,3,4-thiadiazol-3-yl)methyl]piperazin-1-yl}phenyl)ethan-1-one	23	Thiadiazole	12.761	38.7464	7.9058	16.1587
	S=C1SC=NN1CN1CCC2=C(C1)C=CS2	3-({4H,5H,6H,7H-thieno[3,2-c]pyridin-5-yl}methyl)-2,3-dihydro-1,3,4-thiadiazole-2-thione	24	Thiadiazole	12.0186	20.5128	-37.8469	16.1587
	S=C1SC=NN1CN1CCN(CC1)C1=NC=CC=N1	3-{[4-(pyrimidin-2-yl)piperazin-1-yl]methyl}-2,3-dihydro-1,3,4-thiadiazole-2-thione	25	Thiadiazole	4.66638	8.49123	-32.4643	12.4784
	[H]N(C(=O)C1CCCN(CN2N=CSC2=S)C1)C1=CC=CC=C1	N-phenyl-1-[(2-sulfanylidene-2,3-dihydro-1,3,4-thiadiazol-3-yl)methyl]piperidine-3-carboxamide	26	Thiadiazole	4.57875	47.7004	-24.3902	17.9988
	FC1=C(C=CC=C1)N1CCN(CN2N=CSC2=S)CC1	3-{[4-(2-fluorophenyl)piperazin-1-yl]methyl}-2,3-dihydro-1,3,4-thiadiazole-2-thione	27	Thiadiazole	1.47958	19.7193	-32.4643	5.11788
	S=C1SC=NN1CN1CCN(CC1)C1=NC=CN=C1	3-{[4-(pyrazin-2-yl)piperazin-1-yl]methyl}-2,3-dihydro-1,3,4-thiadiazole-2-thione	28	Thiadiazole	-1.25e-14	31.5113	-8.24222	12.4784
	CC1CN(CN2N=C(C)SC2=S)CC(C)O1	3-[(2,6-dimethylmorpholin-4-yl)methyl]-5-methyl-2,3-dihydro-1,3,4-thiadiazole-2-thione	29	Thiadiazole	-3.89396	-1.73267	-102.439	-0.40253
	COC1=C(C=CC=C1)N1CCN(CN2N=C(C)SC2=S)CC1	3-{[4-(2-methoxyphenyl)piperazin-1-yl]methyl}-5-methyl-2,3-dihydro-1,3,4-thiadiazole-2-thione	30	Thiadiazole	-5.56622	7.39599	-134.735	1.43761
	CC1=NN(CN2CCN(CC2)C2=CC=CC=C2)C(=S)S1	5-methyl-3-[(4-phenylpiperazin-1-yl)methyl]-2,3-dihydro-1,3,4-thiadiazole-2-thione	31	Thiadiazole	-7.84221	-4.16996	-115.896	-2.24267
	CC1=NN(CN2CCN(CC2)C2=C(F)C=CC=C2)C(=S)S1	3-{[4-(2-fluorophenyl)piperazin-1-yl]methyl}-5-methyl-2,3-dihydro-1,3,4-thiadiazole-2-thione	32	Thiadiazole	-10.9977	2.2792	-126.661	-0.40253
	CC1=NN(CN2CCN(CC2)C2=CC=C(F)C=C2)C(=S)S1	3-{[4-(4-fluorophenyl)piperazin-1-yl]methyl}-5-methyl-2,3-dihydro-1,3,4-thiadiazole-2-thione	33	Thiadiazole	-11.391	-2.0508	-132.044	-0.40253
	CC1=NN(CN2CCC3=C(C2)C=CC=C3)C(=S)S1	5-methyl-3-[(1,2,3,4-tetrahydroisoquinolin-2-yl)methyl]-2,3-dihydro-1,3,4-thiadiazole-2-thione	34	Thiadiazole	-29.3049	-0.641613	-113.204	3.27775
	CCN1C=NN(CN(C)CC2=NC3=C(S2)C=CC=C3)C1=S	1-({[(1,3-benzothiazol-2-yl)methyl](methyl)amino}methyl)-4-ethyl-4,5-dihydro-1H-1,2,4-triazole-5-thione	35	Triazole	-0.632911	13.5172	-53.995	12.4784	92.0102	85.1377	87.3721	82.005	76.0095	48.8534	15.5607	5.15637	72.3159	67.3616	71.8162	74.5316	60.861	38.1965	22.0944	11.6528
	CCN1C=NN(CN2CCN(CC3=CSC(C)=N3)CC2)C1=S	4-ethyl-1-({4-[(2-methyl-1,3-thiazol-4-yl)methyl]piperazin-1-yl}methyl)-4,5-dihydro-1H-1,2,4-triazole-5-thione	36	Triazole	32.5095	77.5091	48.2759	23.5193
	CN(CN1CCOC1=S)CC1=NC2=C(S1)C=CC=C2	3-({[(1,3-benzothiazol-2-yl)methyl](methyl)amino}methyl)-1,3-oxazolidine-2-thione	37	Oxazolidine	-5.67766	30.8804	-83.5997	6.95802	89.4524	79.6362	63.753	39.7576	13.9114	-0.856678	-10.3976	-16.2974	60.6094	43.7231	29.7356	14.1074	6.28343	-0.311758	-4.39361	-5.3249
	CN(CN1CCOC1=S)CC1=C(Cl)C=CC=C1F	3-({[(2-chloro-6-fluorophenyl)methyl](methyl)amino}methyl)-1,3-oxazolidine-2-thione	38	Oxazolidine	1.79024	17.0216	-78.217	1.43761	90.7538	80.867	70.4307	51.0363	24.814	6.61575	-4.3686	-13.577	53.6939	40.713	30.3531	15.0387	6.06447	-0.174451	-2.80859	-4.96863
