# Supplementary material for: Drug discovery-based approach identifies improved nitrification inhibitors
Source: Research Square preprint supplement (doi:10.21203/rs.3.rs-2297595/v1), 2022-12-29
Supplement: Supplementary file 3 [file 6f3cb482ffa87ba3726bfce4.xlsx]

## Sheet: __JChemStructureSheet
Hash	StructureStringLength	StructureStringFormat	StructureString
7E581980F4225A14DB12131570248459	1	cxsmiles	JChemExcelJgAAAB+LCAAAAAAABAArNkwGAkNnPw1nDWdnI03nYCMNW39NIHLO00g21sxLTjZ2zgEAlUR5aSYAAAA=
CEE5AE0F94E604B1DD5F164CA724980A	1	cxsmiles	JChemExcelLAAAAB+LCAAAAAAABABzNnR2NnTWcNbUcNaw9df01/QD08lGycnJGvlGms55GsnGmnnJycbOOQDJ6rL3LAAAAA==
63916B1D2997F76C4DA299E26044AF2D	1	cxsmiles	JChemExcelLwAAAB+LCAAAAAAABABzNnR2NkzWyIvO84g10kzWcM7RTDZy1rD11/RL1gAJGmvm5SUb6yabJCcnF5sAAIXntqUvAAAA
326977E509AE75CF742952CC4AF29B30	1	cxsmiles	JChemExcelHwAAAB+LCAAAAAAABABzc9Zw0wQiZz8NZ01nDVt/Tec8w7zkZA3nHM1kQ2cA0qECzx8AAAA=
EDB9BDB9B24AC75D33D00EAFEBE2F9CB	1	cxsmiles	JChemExcelLwAAAB+LCAAAAAAABABzdnbWcHbW1AjWsPXXBGFnTWc/ZxAj2TBZwzlHM1kjLzrPI9ZQ09nI2dkIAMorHf8vAAAA
9A2B641F394D21DC9C6C30B2DF3E22EF	1	cxsmiles	JChemExcelLgAAAB+LCAAAAAAABABzNnR2NkzWyIvO84g10kzWcM7RTDZy1rD11/RLNk5OTtZITjbW9DNxBgITW38Au0+xvi4AAAA=
7C41830DE01FFB223DD452E372A25556	1	cxsmiles	JChemExcelKwAAAB+LCAAAAAAABAANwTERADAIA0A7yQgUBZFQCVl7+B/Lv57DEGfgSLoMr6Ixyesz66il/jgUwi0rAAAA
5F561D33333D86EFDF946B768E678D43	1	cxsmiles	JChemExcelLwAAAB+LCAAAAAAABABzTjZM1nDO0QQSmnkaeYaazs4atv6afslGyckgRnSeR2yekW6ycTIIGAMA0ZQ+0y8AAAA=
234FCD6D0BB0A4E918D6FF7CD8033AEF	1	cxsmiles	JChemExcelKQAAAB+LCAAAAAAABADLM0wGAUNnZ79kjTwjzWQNENdYM9k4TyPZyEQzL1nDWTPZxDkHAGLMhFcpAAAA
6E77C23A80E774BAFDA84575236B22D8	1	cxsmiles	JChemExcelKgAAAB+LCAAAAAAABABzNnR2NkzWyIvO84g10kzWcM7RTDZy1rD11/RL1kjOM9ZMzks2djZxdjYBAMPGdKUqAAAA
3B0A86FE3912B52C0076B1CB8700A539	1	cxsmiles	JChemExcelLQAAAB+LCAAAAAAABABzNnR2NkzWyIvO84g10kzWcM7RTDZy1rD11/Rzdtbw03B21gSiZOPk5OR8YwBFnfeoLQAAAA==
331859E66EACECA8435E179535F0CEBE	1	cxsmiles	JChemExcelMQAAAB+LCAAAAAAABABzc9Zw0wSiZMPkZI1kDVt/zeg8j9hkQ00/ZxDHOU8jz0gzWcMZhHM0k42cAVxtLNwxAAAA
7E14B2FCF814FB46080870E87D72DD16	1	cxsmiles	JChemExcelHAAAAB+LCAAAAAAABABzzkk2TM7L00g21HR21vDXTDZKTtZwKtJMTk42AgBtdkK7HAAAAA==
49F36212449301F66C42EF3C2C0921E4	1	cxsmiles	JChemExcelJAAAAB+LCAAAAAAABABzTjZM1nDO0QQSmnkaeYaazslGeckaeflGms7GziDgZwwA3IVHwSQAAAA=
6A7EAC4F659BE8FF853287C6519F583B	1	cxsmiles	JChemExcelIwAAAB+LCAAAAAAABAArNkwGAkNnP2cNW3/NZCMgRyPfSNM5TyPZWDMvOdnYOQcAJRbYaiMAAAA=
A7B28E186C45F5550EA34E2F2C5A8CBE	1	cxsmiles	JChemExcelKwAAAB+LCAAAAAAABABzzkk2TM7L00g21HTWcNYEImcNW39NPw1nI01nZ6C4kbFmMlA0L88YABcmKZYrAAAA
43CBB8E5EDF6F3ECD3DA0217EEABA512	1	cxsmiles	JChemExcelFQAAAB+LCAAAAAAABABzdvZ31vB3dtZ0ztNINtTMS042dM4BAKnS26AVAAAA
7BF2EB5DBAFFACCF1138FBE6EEAA9BCF	1	cxsmiles	JChemExcelHQAAAB+LCAAAAAAABABzzkk2TM7L00g21HRONkpO1sjPM9LUTTZOTk7ONwYAATtwKx0AAAA=
8B7EC8518EA0D91064D5227635653697	1	cxsmiles	JChemExcelKQAAAB+LCAAAAAAABABzNnR2NkzWyIvO84g10kzWcM7RTDZy1rD11/QzdgYC42ST5OTkPBNnAFGwZzspAAAA
E7D5C409A86171C8A7ECA965EF42BD52	1	cxsmiles	JChemExcelKgAAAB+LCAAAAAAABABzzkk2TNZw1szL00g2NNJMTtZIzjPSDNaw9dcEYb9kjTxjzeLkZGNnAEuTnD4qAAAA
CADB3F68DAEA3F6B914A056C2FFA32FE	1	cxsmiles	JChemExcelFgAAAB+LCAAAAAAABABzzkk2TM7L00g21HR29k82SgYBIwAdTh9MFgAAAA==
035EC8239D12150A1FA4DD512BFE9748	1	cxsmiles	JChemExcelLwAAAB+LCAAAAAAABABzTjZM1nDO0QQSmnkaeYaazs4a/prO/skayclGmslAyshYMz9Zw9YfyDF2BgC+U83wLwAAAA==
7CED4A2037A090063CA39D57C5C98659	1	cxsmiles	JChemExcelJAAAAB+LCAAAAAAABABLNkwGAUNnDWdnzWSjvLxkjXwjTT/nZONkDecczeS8PGNnAJ4u6skkAAAA
193D458697C91D07C4CF444E08855F2E	1	cxsmiles	JChemExcelKQAAAB+LCAAAAAAABADzU3Z2dvbTcHbWDNaw9dcE4WSN5DxDzeQ8jWRDI828ZA1nzWQj5xwAxxPoIikAAAA=
EE0BF10AF7BE8019B03FFD0CABB68A0E	1	cxsmiles	JChemExcelLgAAAB+LCAAAAAAABABzzkk2TM7L00g21HTWcAZiW39Nv2SNZBAdnecRm2ykmZxs5KzhpglEbgDPBh/ELgAAAA==
71C07E8D4604BA9ED24574C55E842067	1	cxsmiles	JChemExcelLAAAAB+LCAAAAAAABABzTjZM1nDO0QQSmnkaeYaazs7OGrb+mn7OzkCuEVgcosDIGQCCGQVDLAAAAA==
FC559CD69B03DB2D8948F29334E0A0A2	1	cxsmiles	JChemExcelMAAAAB+LCAAAAAAABAANyaEVACAMxNB1rgLRAhMwSizv2N/RyJ9zSXTCFlnBRHQzkCuG5dWPNdjNb39HGJhNMAAAAA==
833443A579EF70F5A342B7659CA40EA7	1	cxsmiles	JChemExcelKwAAAB+LCAAAAAAABABzNnR2dvYDEn7OGrb+mslGycnJGsnJRpq6eRp5xprJGs4gnKOZbOwMAKN3LJMrAAAA
2D1EED612E6348FB019DCCF28CB26CDF	1	cxsmiles	JChemExcelJwAAAB+LCAAAAAAABABz9nd2dvZz1rD110w2TE5O1khONtTUzdPIM9JM1nAG4RzNZCNnAFj4PFUnAAAA
FF8DB57918285D15E915C40DA61F24E6	1	cxsmiles	JChemExcelKgAAAB+LCAAAAAAABADLN0wGAkNnPw1nzWSNPCMgARIw1kw2ztNINjLRzEsGyZg45wAATBV6oyoAAAA=
971C8D44A762A60DF02BEA27B05AA02B	1	cxsmiles	JChemExcelGwAAAB+LCAAAAAAABABzdjZ09tNwdtYINtR01nRONkrWcM7RTM7LM3IGALvlBv0bAAAA
B87096AC2ACB8770F8C5E57A7772E6C6	1	cxsmiles	JChemExcelMQAAAB+LCAAAAAAABABLNsxLBgJDZz8jZ2c/DWdnI81kjTxjIAESNtFMNsnTSDY21cxL1nDWTDZ1zgEACf9C1zEAAAA=

## Sheet: Table S3
Supplementary Table S3: Small molecules containing a chloro-pyrazole substructure that are included in the screening collection but that do not inhibit nitrification in the nitrification inhibition assays.
Smiles	IUPAC name	Structure
CC(NC(=O)c1ccc(Cn2cc(Cl)cn2)o1)(C1CC1)C(O)=O	2-({5-[(4-chloro-1H-pyrazol-1-yl)methyl]furan-2-yl}formamido)-2-cyclopropylpropanoic acid
C1CC1c(n[nH]2)c(Cl)c2C(=O)Nc([nH]3)nnc3-c4cccs4	4-chloro-3-cyclopropyl-N-[5-(thiophen-2-yl)-4H-1,2,4-triazol-3-yl]-1H-pyrazole-5-carboxamide
FC(F)(F)CN(C)C(=O)Cn1ncc(Cl)c1C	2-(4-chloro-5-methyl-1H-pyrazol-1-yl)-N-methyl-N-(2,2,2-trifluoroethyl)acetamide
CCC(CC)(S(=O)(=O)C)CNC(=O)c1c(Cl)c(n[nH]1)C2CC2	4-chloro-3-cyclopropyl-N-(2-ethyl-2-methanesulfonylbutyl)-1H-pyrazole-5-carboxamide
C1CC1c(n[nH]2)c(Cl)c2C(=O)Nc3ccc(cc3)N4CCCC4=O	4-chloro-3-cyclopropyl-N-[4-(2-oxopyrrolidin-1-yl)phenyl]-1H-pyrazole-5-carboxamide
Clc1c(C)nn(c12)c3c(cccc3)c(n2)Sc4nnnn4C5CC5	5-({3-chloro-2-methylpyrazolo[1,5-a]quinazolin-5-yl}sulfanyl)-1-cyclopropyl-1H-1,2,3,4-tetrazole
Cc1c(Cl)c(C)n(n1)CC(=O)Nc2cc(=O)[nH]n2-c3ccccc3	2-(4-chloro-3,5-dimethyl-1H-pyrazol-1-yl)-N-(5-oxo-2-phenyl-2,5-dihydro-1H-pyrazol-3-yl)acetamide
n1ccccc1CCNc(n2)c(cccc3)c3n(c24)nc(C)c4Cl	3-chloro-2-methyl-N-[2-(pyridin-2-yl)ethyl]pyrazolo[1,5-a]quinazolin-5-amine
C1CC1c(n[nH]2)c(Cl)c2C(=O)Nc(cn3)cnc3C4CC4	4-chloro-3-cyclopropyl-N-(2-cyclopropylpyrimidin-5-yl)-1H-pyrazole-5-carboxamide
C1CC1c(n[nH]2)c(Cl)c2C(=O)NCC(N(CC)CC)c3ccco3	4-chloro-3-cyclopropyl-N-[2-(diethylamino)-2-(furan-2-yl)ethyl]-1H-pyrazole-5-carboxamide
FC(F)(F)c1cc(c(=O)[nH]c1)NC(=O)Cn(n2)c(C)c(Cl)c2C	2-(4-chloro-3,5-dimethyl-1H-pyrazol-1-yl)-N-[2-oxo-5-(trifluoromethyl)-1,2-dihydropyridin-3-yl]acetamide
Clc1cnn(c1)CC(O)c2cc(Br)ccc2	1-(3-bromophenyl)-2-(4-chloro-1H-pyrazol-1-yl)ethan-1-ol
Cc1c(Cl)c(C)n(n1)Cc2nc(no2)C3CCCCCN3	2-{5-[(4-chloro-3,5-dimethyl-1H-pyrazol-1-yl)methyl]-1,2,4-oxadiazol-3-yl}azepane
s1cccc1CNC(=O)c2ccc(o2)Cn(c3)ncc3Cl	5-[(4-chloro-1H-pyrazol-1-yl)methyl]-N-[(thiophen-2-yl)methyl]furan-2-carboxamide
Clc1cnn(c1)C(C)(C)C(=O)N(C2)CCn(c23)c(C)nn3	2-(4-chloro-1H-pyrazol-1-yl)-2-methyl-1-{3-methyl-5H,6H,7H,8H-[1,2,4]triazolo[4,3-a]pyrazin-7-yl}propan-1-one
CCOC(OCC)Cn(c1)ncc1Cl	4-chloro-1-(2,2-diethoxyethyl)-1H-pyrazole
Clc1cnn(c1)Cc2cc(on2)-c3ccco3	3-[(4-chloro-1H-pyrazol-1-yl)methyl]-5-(furan-2-yl)-1,2-oxazole
C1CC1c(n[nH]2)c(Cl)c2C(=O)N3CCCC3c4cccn4C	4-chloro-3-cyclopropyl-5-[2-(1-methyl-1H-pyrrol-2-yl)pyrrolidine-1-carbonyl]-1H-pyrazole
Clc1c(C)nn(c12)cc(cn2)S(=O)(=O)Nc(n3)scc3C	3-chloro-2-methyl-N-(4-methyl-1,3-thiazol-2-yl)pyrazolo[1,5-a]pyrimidine-6-sulfonamide
Clc1cnn(c1)CCOc2ccccc2	4-chloro-1-(2-phenoxyethyl)-1H-pyrazole
Cc1c(Cl)c(C)n(n1)CC(O)COc(cc2)cc(c23)oc(=O)cc3C	7-[3-(4-chloro-3,5-dimethyl-1H-pyrazol-1-yl)-2-hydroxypropoxy]-4-methyl-2H-chromen-2-one
c1ccccc1C(CC)c2nnc(o2)NCc3c(Cl)cnn3C	N-[(4-chloro-1-methyl-1H-pyrazol-5-yl)methyl]-5-(1-phenylpropyl)-1,3,4-oxadiazol-2-amine
N#CCCN(CC)S(=O)(=O)c(cn1)cn(c12)nc(C)c2Cl	3-chloro-N-(2-cyanoethyl)-N-ethyl-2-methylpyrazolo[1,5-a]pyrimidine-6-sulfonamide
Clc1cnn(c1)C(C)C(=O)Nc(c(=O)[nH]c2)cc2C(F)(F)F	2-(4-chloro-1H-pyrazol-1-yl)-N-[2-oxo-5-(trifluoromethyl)-1,2-dihydropyridin-3-yl]propanamide
Cc1c(Cl)c(C)n(n1)CCC(=O)NCCn(n2)c(C)c(Cl)c2C	3-(4-chloro-3,5-dimethyl-1H-pyrazol-1-yl)-N-[2-(4-chloro-3,5-dimethyl-1H-pyrazol-1-yl)ethyl]propanamide
Clc1c(C)nn(c12)c3c(cccc3)c(n2)-n(n4)nnc4-c5ccco5	2-{3-chloro-2-methylpyrazolo[1,5-a]quinazolin-5-yl}-5-(furan-2-yl)-2H-1,2,3,4-tetrazole
C1CCCN1CCNC(=O)c2ccc(cc2)-n(n3)c(C)c(Cl)c3C	4-(4-chloro-3,5-dimethyl-1H-pyrazol-1-yl)-N-[2-(pyrrolidin-1-yl)ethyl]benzamide
COCCCNC(=O)c1ccc(cc1)-n(n2)c(C)c(Cl)c2C	4-(4-chloro-3,5-dimethyl-1H-pyrazol-1-yl)-N-(3-methoxypropyl)benzamide
o1cccc1CN(C)c(n2)c(cccc3)c3n(c24)nc(C)c4Cl	3-chloro-N-[(furan-2-yl)methyl]-N,2-dimethylpyrazolo[1,5-a]quinazolin-5-amine
CC1CN(CC(S1)C)Cc2c(Cl)cnn2C	4-[(4-chloro-1-methyl-1H-pyrazol-5-yl)methyl]-2,6-dimethylthiomorpholine
c1ncccc1CN2CCN(CC2)c(n3)c(cccc4)c4n(c35)nc(C)c5Cl	1-{3-chloro-2-methylpyrazolo[1,5-a]quinazolin-5-yl}-4-[(pyridin-3-yl)methyl]piperazine
