# Supplementary material for: Drug discovery-based approach identifies improved nitrification inhibitors
Source: Research Square preprint supplement (doi:10.21203/rs.3.rs-2297595/v1), 2022-12-29
Supplement: Supplementary file 4 [file 8b6080ca3ca8aa3690a40d44.xlsx]

## Sheet: Feuil1
Supplementary Table S1: Soil characteristics of the three agricultural soils used in the soil assays. Chemical and granulometric analysis was performed by ' Le centre provincial de l'agriculture et de la ruralité (CPAR - https://www.brabantwallon.be/bw/entreprendre-travailler/agriculture-1/le-centre-provincial-de-l-agriculture-et-de-la-ruralite-cpar/).
Soil	P	K	Mg	Na	Ca	pH_KCl	C_org	Humus	Fe	Mn	Cu	Zn	total N	C/N	pH_water	CEC	Clay	Fine silt	Coarse silt	Total silt	Fine sand	Coarse sand	Total sand
	mg/100g	mg/100g	mg/100g	mg/100g	mg/100g		g/kg	%	mg/kg	mg/kg	mg/kg	mg/kg	%			meq/100g	%	%	%	%	%	%	%
Moorslede	43.805	36.8524	24.7845	9.04887	235.283	7.1	10.63	2.126	993.774	116.88	11.4554	19.6263	0.11497	9.24589	7.76	8.76644	11.0857	12.0063	28.8459	40.8522	41.3248	6.73735	48.0621
Sint Laureins	21.797	21.7789	15.5033	2.47736	577.73	7.52	9.86	1.9712	561.459	88.3747	4.12119	7.28378	0.10977	8.97877	8.17	8.74462	9.75088	9.67225	13.4468	23.119	56.9105	10.2196	67.1301
BOPACT	13.599	42.5616	17.45	1.28388	121.101	6.65	11.37	2.2738	247.115	128.771	3.08089	9.31278	0.11566	9.82967	7.23	5.30467	5.27241	6.68602	27.47	34.156	51.2875	9.28402	60.5716
